1 **Body shape as a visual feature: evidence from spatially-global attentional modulation in**  
2 **human visual cortex**

3

4 Abbreviated title: Body shape as a visual feature

5

6 Sushrut Thorat<sup>1</sup>, Marius V. Peelen<sup>1</sup>

7

8 <sup>1</sup>Donders Institute for Brain, Cognition and Behaviour, Radboud University, Nijmegen, The

9 Netherlands.

10

11 Corresponding author:

12 Marius V. Peelen

13 Donders Institute for Brain, Cognition and Behaviour

14 Radboud University

15 Thomas van Aquinostraat 4, 6525 GD Nijmegen, The Netherlands

16 Email: [marius.peelen@donders.ru.nl](mailto:marius.peelen@donders.ru.nl)

17

18

19

20 Conflict of interest statement: The authors declare no competing financial interests.

21 Acknowledgements: This project has received funding from the European Research Council

22 (ERC) under the European Union's Horizon 2020 research and innovation programme (grant

23 agreement No. 725970).

24 **Abstract**

25 Feature-based attention modulates visual processing beyond the focus of spatial attention.  
26 Previous work has reported such spatially-global effects for low-level features such as color and  
27 orientation, as well as for faces. Here, using fMRI, we provide evidence for spatially-global  
28 attentional modulation for human bodies. Participants were cued to search for one of six object  
29 categories in two vertically-aligned images. Two additional, horizontally-aligned, images were  
30 simultaneously presented but were never task-relevant across three experimental sessions.  
31 Analyses time-locked to the objects presented in these task-irrelevant images revealed that  
32 responses evoked by body silhouettes were modulated by the participants' top-down attentional  
33 set, becoming more body-selective when participants searched for bodies in the task-relevant  
34 images. These effects were observed both in univariate analyses of the body-selective cortex  
35 and in multivariate analyses of the object-selective visual cortex. Additional analyses showed  
36 that this modulation reflected response gain rather than a bias induced by the cues, and that it  
37 reflected enhancement of body responses rather than suppression of non-body responses.  
38 These findings provide evidence for a spatially-global attention mechanism for body shapes,  
39 supporting the rapid and parallel detection of conspecifics in our environment.

## 40 **Introduction**

41 The capacity limits of the human visual system require selecting visual input for further  
42 processing and conscious access (Carrasco, 2011; Chun et al., 2011). One way to do this is to  
43 select specific locations of the visual field through spatial attention and eye movements.  
44 However, when searching for task-relevant objects in our environment, the location of these  
45 objects is typically not yet known. In this case, selection may operate at the level of visual  
46 features, using a selection mechanism termed feature-based attention (Maunsell and Treue,  
47 2006). To be an effective selection mechanism, feature-based attention would need to operate  
48 in parallel across the whole or part of the visual field, in order to then guide spatial attention to  
49 the location of the target object (Wolfe, 1994). While this could be a plausible mechanism of  
50 attentional selection, it raises a core question: what are the features of feature-based attention?

51 At a neural level, it has been proposed that feature-based attention may be restricted to  
52 features to which sensory neurons are systematically tuned (Maunsell and Treue, 2006).

53 Accordingly, the neural mechanisms of feature-based attention have been studied extensively  
54 with experiments involving low-level features for which such tuning has been established, such  
55 as the orientations of Gabor patches (Kamitani and Tong, 2005; Liu et al., 2007; Jehee et al.,  
56 2011) and the movement direction of random dot patterns (Treue and Trujillo, 1999; Saenz et  
57 al., 2002; Serences and Boynton, 2007). These experiments assessed how making one feature  
58 task-relevant influenced the responses of neurons that were selective or non-selective to that  
59 feature. A common finding was that attending to a low-level feature increased the responses of  
60 neurons selective to that feature and decreased the responses of neurons non-selective to that  
61 feature (Maunsell and Treue, 2006). Crucially, such modulations were shown to occur for stimuli  
62 presented in spatially-unattended and task-irrelevant locations (Treue and Trujillo, 1999; Saenz  
63 et al., 2002; Serences and Boynton, 2007; Zhang and Luck, 2009), providing evidence for a

64 spatially-global mechanism of feature-based attention that can be distinguished from the effects  
65 of spatial attention.

66 In the present study, we tested whether global attentional modulation can similarly be  
67 observed for the shape of the human body, a category of high social and biological significance  
68 that is selectively represented in high-level visual cortex (Downing et al., 2001; Peelen &  
69 Downing, 2005). Behavioral studies have shown that bodies, like faces, gain preferential access  
70 to awareness (Stein et al., 2012) and automatically attract attention (Downing et al., 2004; Ro et  
71 al., 2007). There is also behavioral evidence for spatially-global attention effects for bodies: in a  
72 series of studies, spatial attention was captured by body silhouettes when participants searched  
73 for people in scenes presented in different parts of the visual field (Reeder and Peelen, 2013;  
74 Reeder et al., 2015). Finally, an fMRI study reported spatially-global modulation of multivoxel  
75 activity patterns distinguishing natural scenes with people from natural scenes with cars (Peelen  
76 et al., 2009). However, in that study, the relative contributions of scene context and of body,  
77 face, and car features could not be distinguished, such that it remains unknown whether  
78 feature-based attention effects exist for human bodies.

79 Here, we used fMRI to test for spatially-global attentional modulation of body processing  
80 in visual cortex. Participants detected the presence of bodies or one of five other categories  
81 (beds, bottles, cars, chairs, lamps) in task-relevant vertically-aligned images, thereby  
82 manipulating the top-down attentional set. To test for spatially-global attentional modulation, all  
83 analyses focused on responses evoked by objects that were concurrently presented at locations  
84 that were never relevant for the object detection task across three experimental sessions (Fig.  
85 1A). The inclusion of five non-body categories reduced the possibility that participants could use  
86 a low-level feature to detect the presence of bodies, for example by looking for vertical (bodies)  
87 vs horizontal (e.g., cars) stimuli: lamps and bottles shared the vertical orientation with bodies  
88 (Fig 1D). To further reduce this possibility, each category was represented by a large and  
89 diverse set of exemplars cropped out of scene photographs. Finally, the use of silhouettes

90 avoided possible low-level differences between categories in texture and color, and ensured  
91 that attention was guided by body shape rather than facial features (Störmer et al., 2019).

(A) Main experiment block structure

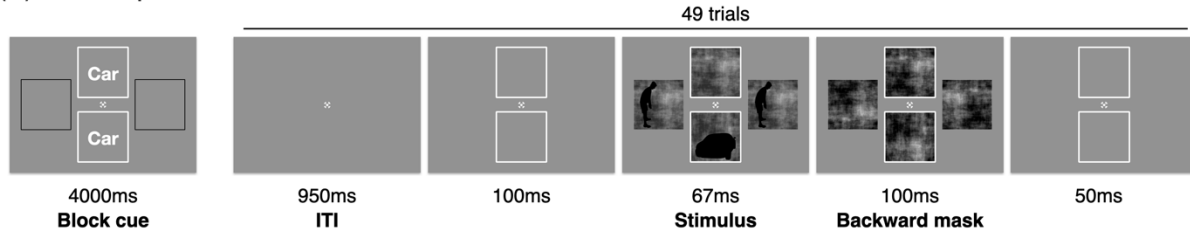

(B)

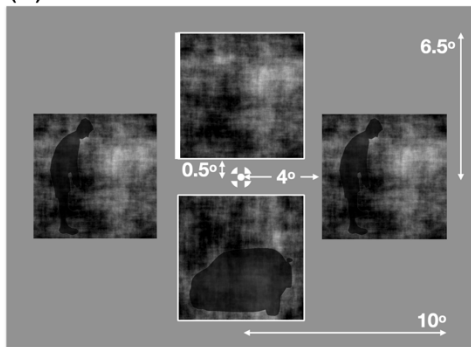

(C) Baseline experiment mini-block structure

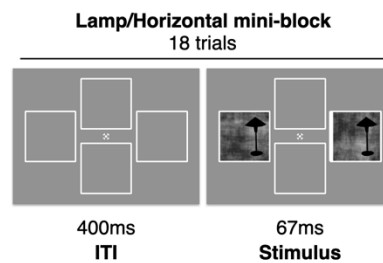

(D) Objects

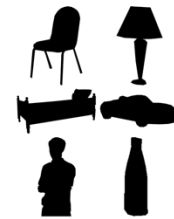

92

93 **Figure 1: Experimental design.** (A) The main experiment was designed to reveal the modulatory  
94 influence of feature-based attention on object responses evoked by stimuli presented at task-irrelevant  
95 locations (horizontal boxes). In each block (49 trials), participants had to search for the cued object  
96 category (e.g., car) in the vertical boxes, while objects were simultaneously presented in the horizontal  
97 boxes. (B) The spatial layout of the search display. (C) The baseline experiment was included to localize  
98 body-selective regions of interest (for the univariate analyses) and to obtain prototypical object category  
99 response patterns (for the multivariate analyses). Responses evoked by task-irrelevant objects in the  
100 main experiment were compared to these responses. Participants had to indicate if one of the edges of  
101 the two boxes thickened. The object category and location (horizontal or vertical boxes) varied across the  
102 mini-blocks. Unlike in the main experiment, the stimuli were not backward masked in order to increase  
103 visibility. (D) Exemplars of the six object categories: chairs, lamps, beds, cars, human bodies, bottles.  
104 Fifty exemplars were used for each category.

105

## 106 **Materials and Methods**

### 107 *Participants*

108 Twenty-three healthy adult volunteers with normal or corrected-to-normal vision gave written  
109 informed consent and participated in the experiment. All participants took part in three  
110 experimental sessions, on different days. One participant was excluded because of low  
111 performance on the visual search task (the difference between the proportion of false alarms  
112 and hits was lower than two standard deviations from the average difference). Twenty-two  
113 participants (mean age: 25.36 years; age range: 20-32 years; 11 female) were included in the  
114 reported analyses. The study was approved by the local ethics committee (CMO Arnhem-  
115 Nijmegen).

### 116 *Experimental Paradigm*

117 In the main experiment, on each trial, the display contained two boxes in the horizontal and  
118 vertical locations (Fig. 1). The vertical boxes had a white bounding frame, signifying their  
119 relevance. Each of the four boxes contained a random image containing the average power  
120 spectrum of the objects from the six categories with random phases. Objects were mixed with  
121 these random images. On each trial, an exemplar from one of the six categories could be  
122 presented in one of the two vertical boxes (1/7 probability each) or no object would be  
123 presented (1/7 probability). Simultaneously, an exemplar from one of the six categories could be  
124 presented in both the horizontal boxes (1/7 probability each) or no object would be presented  
125 (1/7 probability). Each block consisted of 49 trials to fill the co-occurrence matrix of the  
126 horizontal and vertical object conditions, such that the conditions presented in the horizontal and  
127 vertical boxes were orthogonal to each other.

128 In each block of the main experiment, participants would either search for one of the six  
129 categories in the vertical boxes or would detect a thickening of the frames of the bounding

130 boxes in the vertical location (for trial layout, see Fig. 1). Participants pressed the response  
131 button when the cued object category was shown in one of the vertical locations, which  
132 occurred on 7/49 trials. Participants had to respond within 1.2s. The brief presentation duration  
133 (67 ms) required participants to maintain fixation to be able to detect the target in one of the two  
134 vertical locations. Participants were instructed that they could ignore the objects presented at  
135 the horizontal locations. In the thickening condition, participants had to indicate, by pressing the  
136 response button, when one of the sides of the two bounding boxes became thicker than the  
137 others (thickening occurred on 7/49 trials in all blocks). Data from these thickening task blocks  
138 in the main experiment were not further analyzed because the within-block comparisons  
139 provided a more stringent test of our hypotheses, controlling for block-based effects (e.g.,  
140 related to the processing of the category cue itself). The simultaneously presented objects in the  
141 horizontal boxes were always task-irrelevant. Each run contained four blocks, all containing a  
142 different search condition, such that across the seven search runs in each fMRI session each  
143 search block occurred four times. Feedback about search performance was provided at the end  
144 of each block.

145 In addition to the main experiment, participants completed a “baseline” experiment. This  
146 experiment was included to localize body-selective regions of interest (for the univariate  
147 analyses) and to obtain prototypical object category response patterns (for the multivariate  
148 analyses). In the baseline experiment, in different blocks, exemplars of one of the six categories  
149 or scrambled exemplars of one of the six categories were presented in both the boxes in either  
150 the horizontal or vertical locations (the other location left empty). These objects were mixed with  
151 a random image containing the average power spectrum of the objects from the six categories  
152 with random phases. The seven object conditions (six object categories and a scrambled  
153 objects condition containing a mix of scrambled objects from the six categories) and two  
154 presentation locations were blocked into mini-blocks containing 18 trials each. In each mini-  
155 block, participants had to search for thickening of the frames of the boxes where objects were

156 being presented (1/7 probability of presence; each pair of thickening events had at least two  
157 non-thickening trials between them). Each block contained seven mini-blocks, with distinct  
158 object-location pairing, such that across the four blocks in each baseline experiment run, each  
159 type of block occurred twice. At the end of each block performance feedback was provided.

160 Each participant attended three experimental sessions. The first behavioral session  
161 required each participant to get exposed to the entire set of objects followed by the completion  
162 of one run of the baseline experiment and two runs of the main experiment. The second and the  
163 third sessions involved fMRI. In each of those sessions, the participant first browsed through the  
164 entire set of objects at their own pace, and then performed one run of the main experiment  
165 during the anatomical scan. This was followed by the functional recordings as the participants  
166 performed one run of the baseline experiment followed by four runs of the main experiment  
167 followed by one run of the baseline experiment followed by three runs of the main experiment.

## 168 *Stimuli*

169 The stimulus presentation dimensions are shown in Fig. 1B. We acquired 50 exemplar  
170 silhouettes in real-world poses for each of the six categories of interest (beds, bottles, cars,  
171 chairs, lamps, and human bodies; shown in Fig. 1D). We obtained scenes containing the  
172 relevant objects from the SUN2012 database (Xiao et al., 2010) and Google images which were  
173 “Labelled for non-commercial reuse with modifications”, cropped out the objects, scaled them  
174 such than on one of the axes of the objects extended throughout the image, and converted  
175 them to silhouettes.

176 On each trial, the chosen exemplars were shown in the boxes, embedded in noise as  
177 mentioned above. The location of the objects within the boxes was jittered to increase  
178 variability. Objects that extended throughout the image horizontally were presented in one of  
179 three places within the box: touching the upper side, centered, or touching the lower side of the  
180 box. Similarly, objects that extended throughout the image vertically could be placed touching



181 the left side, centered, or the right side of the box. The horizontally-placed boxes in the display  
182 contained the same stimulus (Fig. 1C).

### 183 *fMRI data acquisition and preprocessing*

184 Functional (echo-planar imaging (EPI) sequence; 66 transverse slices per volume; resolution:  
185 2x2x2mm; repetition time (TR): 1s; time to echo (TE): 35.2ms; flip angle: 60°; 6x multi-band  
186 acceleration factor) and anatomical (MPRAGE sequence; 192 sagittal slices; TR: 2.3s; TE:  
187 3.03ms; flip angle: 8°; 1x1x1mm resolution; FOV: 256mm) images were acquired with a 3T  
188 MAGNETOM Skyra MR scanner (Siemens AG, Healthcare Sector, Erlangen, Germany) using a  
189 32-channel head coil.

190 The functional data were analyzed using MATLAB (2017a) and SPM12. During  
191 preprocessing, within each session, the functional volumes were realigned, co-registered to the  
192 structural image, re-sampled to a 2x2x2mm grid, and spatially normalized to the Montreal  
193 Neurological Institute 305 template included in SPM12. Data were high-pass filtered with a cut-  
194 off of 128s. Temporal autocorrelations were accounted for using the AR(1) method in SPM. A  
195 gaussian filter (FWHM 3 mm) was applied to smooth the images.

### 196 *Statistical analysis*

197 For each participant, general linear models (GLMs) were created to model the conditions in the  
198 experiment. In the main experiment, the GLM included regressors for the 49 conditions of  
199 interest: 7 attention blocks x 7 stimulus conditions presented in the task-irrelevant (horizontal)  
200 locations. As this was an event-related design, the onsets of the stimuli were modelled as  
201 impulse functions (delta functions) and the time series was convolved with the canonical HRF.  
202 In the baseline experiment, the GLM included regressors for the 14 conditions of interest: 7  
203 stimulus conditions x 2 presentation locations. As this was a block-design, the mini-blocks  
204 corresponding to each stimulus condition were modelled as boxcars and the time series was

205 convolved with the canonical HRF. Separate GLMs were executed for each run of the main and  
206 baseline experiments. The acquired regression weights were averaged across repetitions of the  
207 corresponding conditions across the runs. Regressors of no interest were also included to  
208 account for differences in the mean MR signal across scans and for head motion within scans.

209 In the univariate analysis, the regression weights (betas) from the GLM were compared  
210 between conditions after averaging across the voxels of a region of interest (ROI). In the  
211 multivariate analysis, the pattern of betas from the GLM across the voxels of an ROI were  
212 compared between conditions using Kendall's tau correlation coefficient ( $\tau$ ) as a metric for  
213 similarity. Before comparing the betas between the main and baseline experiments, the data  
214 were mean-centered: the mean across all main experiment condition betas was subtracted from  
215 those condition betas (separately for each voxel), and the mean across all baseline experiment  
216 condition betas were subtracted from those condition betas.

### 217 *Regions of interest*

218 All ROIs were defined across both hemispheres (except FBA, which was limited to the right  
219 hemisphere). In the multivariate analysis, we focused on two ROIs, the lateral-occipital cortex  
220 (LOC) and the early visual cortex (EVC). The LOC ROI was defined using a group-constrained  
221 subject-specific method (Fedorenko et al., 2010). The group-level ROI was defined by first  
222 contrasting the average response to the 6 object categories with the response to the scrambled  
223 objects in the baseline experiment. Threshold-free cluster enhancement (TFCE; Smith and  
224 Nichols, 2009) with a permutation test was used to correct for multiple comparisons (at  $p < 0.05$ )  
225 across the whole brain. The resulting voxels were intersected with the lateral occipital cortex  
226 ROI from Julian et al. (Julian et al., 2012) to obtain the group-level LOC ROI. Then, for each  
227 participant, the 1000 most object-selective voxels (average object response - scrambled  
228 stimulus response, in the baseline experiment horizontal conditions) within the group-level LOC  
229 ROI were selected for further analysis. The EVC ROI was defined at the individual participant

230 level as the 1000 most responsive voxels (average object response > 0, in the baseline  
231 experiment horizontal conditions) in Brodmann area 17 (corresponding to V1; Wohlschläger et  
232 al., 2005). Brodmann area 17 was taken from the Brodmann atlas available in SPM12.

233 In the univariate analysis we focused on two body-selective ROIs, the extrastriate body  
234 area (EBA; Downing et al., 2001) and the fusiform body area (FBA; Peelen and Downing, 2005).  
235 The ROIs were defined using the method described above for LOC. The group-level ROI was  
236 defined by first contrasting the response to bodies with the average response to the other 5  
237 categories in the baseline experiment. TFCE was used to correct for multiple comparisons (at  $p$   
238 < 0.05) across the whole brain. The resulting voxels were intersected with ROIs from Julian et  
239 al. (2012): the extrastriate body area ROI to obtain the group-level EBA ROI and the fusiform  
240 face area (FFA) ROI to obtain the group-level FBA ROI (FBA is not provided, but the FFA and  
241 FBA closely overlap at the group-level; Peelen and Downing, 2005). Then, for each participant,  
242 the 20 most body-selective voxels (body response - average response to other objects, in the  
243 baseline experiment horizontal conditions) within the group-level ROIs were selected for further  
244 analysis.

#### 245 *Multivariate analysis approach*

246 In the multivariate analyses, we correlated multivoxel activity patterns evoked by the task-  
247 irrelevant objects in the main experiment with multivoxel activity patterns evoked by the clearly  
248 visible objects in the baseline experiment, using Kendall rank-ordered correlation;  $\tau$ . We expect  
249 to find stronger correlations between corresponding object categories (e.g., between bodies in  
250 the main experiment and bodies in the baseline experiment), than between non-corresponding  
251 categories (e.g. between bodies in the main experiment and beds in the baseline experiment).  
252 As such, the difference between corresponding and non-corresponding category correlations is  
253 a measure of category processing (Peelen et al., 2009), analogous to decoding accuracy. Here,  
254 we computed *proximity* to the categories in the baseline experiment as the correlation with that

255 category minus the correlation with the other categories in the baseline experiment. For  
256 example, for bodies, the proximity to bodies (in the baseline experiment) is the correlation  
257 between bodies in the main experiment and bodies in the baseline experiment minus the  
258 average correlation between bodies in the main experiment and the other five categories in the  
259 baseline experiment.

#### 260 *Image-based discriminability approach*

261 To rule out that bodies differed systematically from the other objects in terms of low-level  
262 features, we used representations of the exemplars in the layers of a convolutional neural  
263 network (trained for object recognition in natural images; CNN; AlexNet: Krizhevsky et al., 2012)  
264 to test for image-based categorizability differences across the categories. Output activations at  
265 each layer corresponding to 50 exemplars of each of the six categories, embedded in noise as  
266 in the fMRI experiment, in the three possible locations defined by the shapes (see the  
267 subsection on Stimuli), were extracted. Balanced linear support vector machines (SVM) were  
268 trained to classify between the images of one category (150 images each) as opposed to the  
269 other categories. 10-fold cross-validated classification accuracies were reported for each  
270 category for each layer of the CNN.

## 271 **Results**

272 In the main experiment, participants detected the presence of object silhouettes belonging to  
273 one of six categories (Fig. 1D), in different blocks. Throughout the experiment, only the  
274 vertically-aligned locations were relevant for the detection task (Fig. 1A). Each block started with  
275 a category cue (e.g. “Car”) indicating the target category for that block (Fig. 1A), followed by 49  
276 object detection trials. In 42 trials (6/7th), one of the two task-relevant locations contained a  
277 briefly-presented object (67 ms) within phase-scrambled noise (Fig. 1B), with each category  
278 presented equally often (7 trials each). In the remaining 7 trials (1/7th) no object was presented.

279 Crucially, in 6/7th of the trials, two objects were simultaneously presented in the  
280 horizontally-aligned locations (Fig. 1A). These objects were briefly presented (67 ms),  
281 embedded in noise, and backward masked. This was done to reduce the possibility of  
282 participants moving their eyes (and/or spatial attention) to the task-irrelevant objects. Objects at  
283 the horizontal locations were never relevant for the participants and participants were instructed  
284 that these could be completely ignored. The occurrence probabilities of the categories were the  
285 same as for the task-relevant locations. The 7 vertical and 7 horizontal conditions were fully  
286 crossed within each block, resulting in 49 trials, which were presented in random order. Trials  
287 were coded according to the categories presented in the horizontally aligned (task-irrelevant)  
288 locations, as these were the focus of our analyses.

### 289 *Task performance (task-relevant locations)*

290 Averaged across the two fMRI sessions and across object search blocks, participants had a hit  
291 rate of 78.3% (proportion of the target-present trials where participants responded) and a false  
292 alarm rate of 5.6% (proportion of the target-absent trials where participants responded),  
293 resulting in an average  $d'$  ( $zscore(\text{hit rate}) - zscore(\text{false alarm rate})$ ) of 2.7 (beds: 2.0; cars: 2.4;  
294 bottles: 2.6; bodies: 2.9; chairs: 2.9; lamps: 3.3). Note that this was the performance for the  
295 task-relevant stimuli presented at the vertical locations. All fMRI analyses focused on the

296 objects presented at the task-irrelevant horizontal locations. For responses to objects at the  
297 task-irrelevant locations, we refer the reader to the section *The relationship between attentional*  
298 *modulation and behavioral responses*.

### 299 *Univariate results in EBA and FBA*

300 Previous research has shown that bodies evoke a selective univariate response in two focal  
301 regions of high-level visual cortex: the extrastriate body area (EBA; Downing et al., 2001) and  
302 the fusiform body area (FBA; Peelen & Downing, 2005). Here, EBA and FBA were defined  
303 based on responses in the baseline experiment (see Material and Methods). We tested for  
304 spatially-global attention effects for bodies in these ROIs by comparing body-selective  
305 responses in EBA and FBA evoked by task-irrelevant bodies across target detection blocks in  
306 the main experiment. Betas were averaged across the voxels of each ROI to acquire one beta  
307 per condition for each ROI. For each category, the beta corresponding to within-block trials in  
308 which no objects were presented was subtracted to account for block effects. Responses to  
309 non-body objects and non-body detection blocks were averaged, such that we had 4 values for  
310 each ROI: body and non-body stimuli, presented in the body and non-body detection blocks.  
311 The difference between body and non-body stimuli within each block is a measure of body  
312 selectivity.

313 A 2 (ROI) x 2 (attention: body, other categories) repeated-measures ANOVA on body  
314 selectivity (response to bodies minus average response to other categories) revealed a main  
315 effect of attention ( $F_{1,21} = 7.2$ ,  $p = 0.014$ ,  $\eta^2_p = 0.25$ ), reflecting stronger body selectivity in body  
316 attention blocks than non-body attention blocks (Fig. 2A). This attention effect interacted with  
317 ROI ( $F_{1,21} = 4.6$ ,  $p = 0.043$ ,  $\eta^2_p = 0.18$ ), being stronger for EBA than FBA. When analyzed  
318 separately, both EBA and FBA showed an attention effect, such that body selectivity was higher  
319 in body detection blocks than in other category detection blocks (EBA:  $F_{1,21} = 7.4$ ,  $p = 0.013$ ,  $\eta^2_p$   
320  $= 0.26$ ; FBA:  $F_{1,21} = 4.4$ ,  $p = 0.049$ ,  $\eta^2_p = 0.17$ ; Fig. 2A). The attention effect was consistent

321 across ROI sizes (Fig. 5). In EBA, bodies evoked a selective response in both the body  
322 detection blocks ( $t_{21} = 4.6$ ,  $p < 0.001$ ,  $d = 1.00$ ) and the other category detection blocks ( $t_{21} =$   
323  $4.4$ ,  $p < 0.001$ ,  $d = 0.96$ ), while in FBA body selectivity was only positive in the body detection  
324 blocks ( $t_{21} = 2.5$ ,  $p = 0.02$ ,  $d = 0.55$ ; other category detection blocks:  $t_{21} = 0.8$ ,  $p = 0.42$ ,  $d =$   
325  $0.17$ ).

326 The attention effect for bodies in EBA and FBA could reflect enhanced responses to  
327 bodies presented in body detection blocks, but may also (or additionally) reflect reduced  
328 responses (suppression) to the other categories presented in body detection blocks. To test  
329 these alternatives, we compared body and object-evoked responses across the body and  
330 object-detection blocks (after subtracting the response to blanks within each block). Averaged  
331 across ROIs, there was a higher response to bodies in body detection blocks than in other  
332 category detection blocks, which was marginally significant (paired t-test,  $t_{21} = 2.1$ ,  $p = 0.05$ ,  $d =$   
333  $0.46$ ; Fig. 2B). There was no evidence that the response to the other objects was suppressed,  
334 with equally strong responses in both blocks (paired t-test,  $t_{21} = 0.19$ ,  $p = 0.85$ ,  $d = 0.04$ ). These  
335 effects were also observed, though weaker, in each ROI separately (statistics provided in Fig.  
336 2B).

337 These results provide the first evidence for spatially-global attentional modulation for  
338 body silhouettes, show that these effects are strongest in EBA, and link these effects to  
339 enhancement of body responses rather than suppression of non-body responses.

340

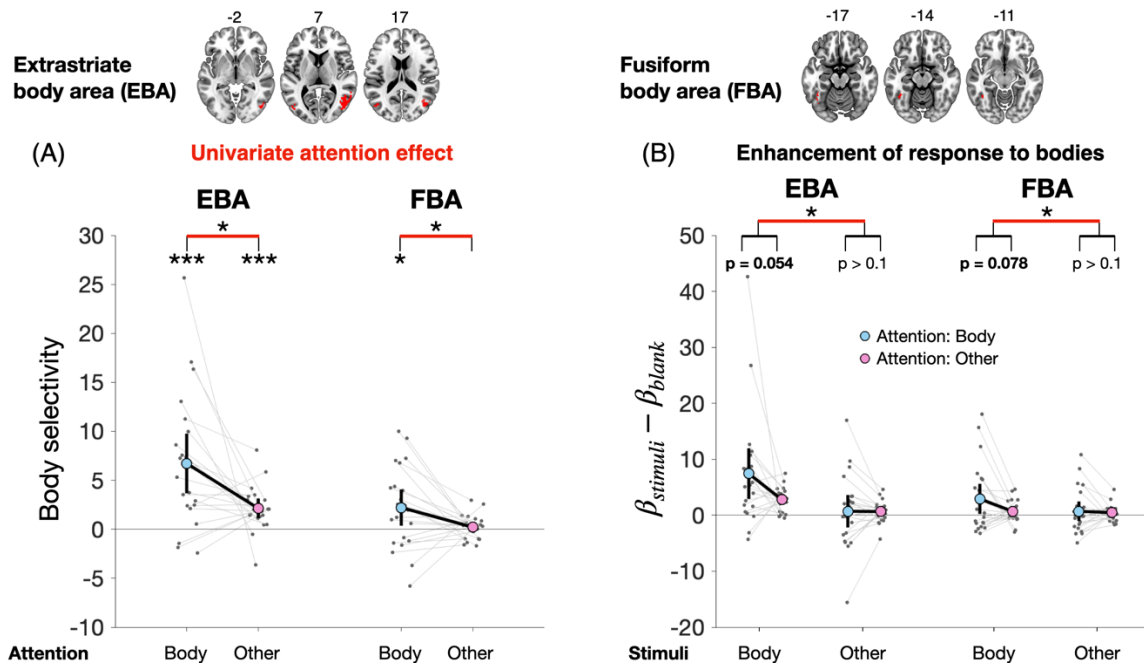

341

342

343

344 **Figure 2: Univariate attention effect in body-selective ROIs.** (A) Body selectivity (response to body -

345 average response to other objects) was higher when bodies were attended, in both ROIs. This provides

346 evidence for spatially-global attentional modulation for body silhouettes. (B) Across ROIs, the response to

347 bodies (corrected for block-wise differences by subtracting the corresponding blank responses) was

348 enhanced while the responses to other categories remained unchanged. Error bars indicate 95%

349 confidence intervals for the measures indicated on the y-axes. The asterisks indicate p-values for the t-

350 tests of the corresponding comparisons (\* $p < 0.05$ , \*\* $p < 0.01$ , \*\*\* $p < 0.001$ ). EBA and FBA ROIs are

351 displayed together with MNI z-coordinates.

352

### 353 *Multivariate results in LOC*

354 Previous studies have shown that multivoxel activity patterns in object-selective cortex

355 distinguish between object shapes (Haushofer et al., 2008; Op de Beeck et al., 2008; Eger et

356 al., 2008). This gave us another opportunity to test for spatially-global effects of attention,



357 including for non-body categories. Here, instead of body selectivity, we used proximity (Pr) as  
358 dependent measure. Proximity was based on correlations between response patterns in the  
359 main experiment and response patterns in the baseline experiment, following previous work  
360 (Peelen et al., 2009). Proximity reflects how similar a category's response pattern in the main  
361 experiment is to a category's response pattern in the baseline experiment, relative to the other  
362 categories in the baseline experiment (Materials and Methods). For example, for bodies, the  
363 proximity to bodies (in the baseline experiment) is the correlation between bodies in the main  
364 experiment and bodies in the baseline experiment minus the average correlation between  
365 bodies in the main experiment and the other five categories in the baseline experiment.

#### 366 *Attentional modulation for bodies in LOC*

367 The proximity to bodies is shown in Fig. 3A. A 2 (attention: body, other categories) x 2 (stimulus  
368 presented: body, other categories) repeated-measures ANOVA revealed a significant interaction  
369 ( $F_{1,21} = 30.4$ ,  $p < 0.001$ ,  $\eta^2_p = 0.59$ ), reflecting a stronger difference between the proximities for  
370 body and non-body categories when participants attended to bodies ( $t_{21} = 9.9$ ,  $p < 0.001$ ,  $d =$   
371  $2.2$ ) than when they attended to the other categories ( $t_{21} = 8.1$ ,  $p < 0.001$ ,  $d = 1.8$ ). The  
372 multivariate attention effect in LOC was consistent across ROI sizes (Fig. 5). These results  
373 provide further evidence for spatially-global attentional modulation of body processing.

374 The attention effect for bodies in LOC could reflect enhanced proximity to bodies for the  
375 bodies presented in body detection blocks, but may also (or additionally) reflect reduced  
376 proximity to bodies (suppression) for the other categories presented in body detection blocks.  
377 To test for body-selective enhancement, we compared the proximity (to bodies in the baseline  
378 experiment) for bodies in the body detection blocks with the corresponding proximity of other  
379 objects in the body detection blocks. To account for overall differences between blocks (e.g.,  
380 related to the cue or to block-based attentional bias), we subtracted the proximity to bodies for  
381 the within-block trials in which no objects were presented. Results showed that proximity to

382 bodies was significantly enhanced for bodies presented in the body detection blocks as  
 383 compared with bodies presented in the other detection blocks ( $t_{21} = 3.5$ ,  $p = 0.002$ ,  $d = 0.76$ ;  
 384 blue comparison in Fig. 3B). There was no evidence for suppression: proximity to bodies was  
 385 not different for objects presented in the body detection blocks as compared with objects  
 386 presented in the other detection blocks ( $t_{21} = 0.3$ ,  $p = 0.78$ ,  $d = 0.06$ ; green comparison in Fig.  
 387 3B). The difference between these effects (red comparison in Fig. 3B) corresponds to the same  
 388 multivariate attention effect as shown in Fig. 3A. These results show that the multivariate  
 389 attention effect was primarily driven by the enhancement of body-selective response patterns, in  
 390 line with the univariate results (Fig. 2).  
 391

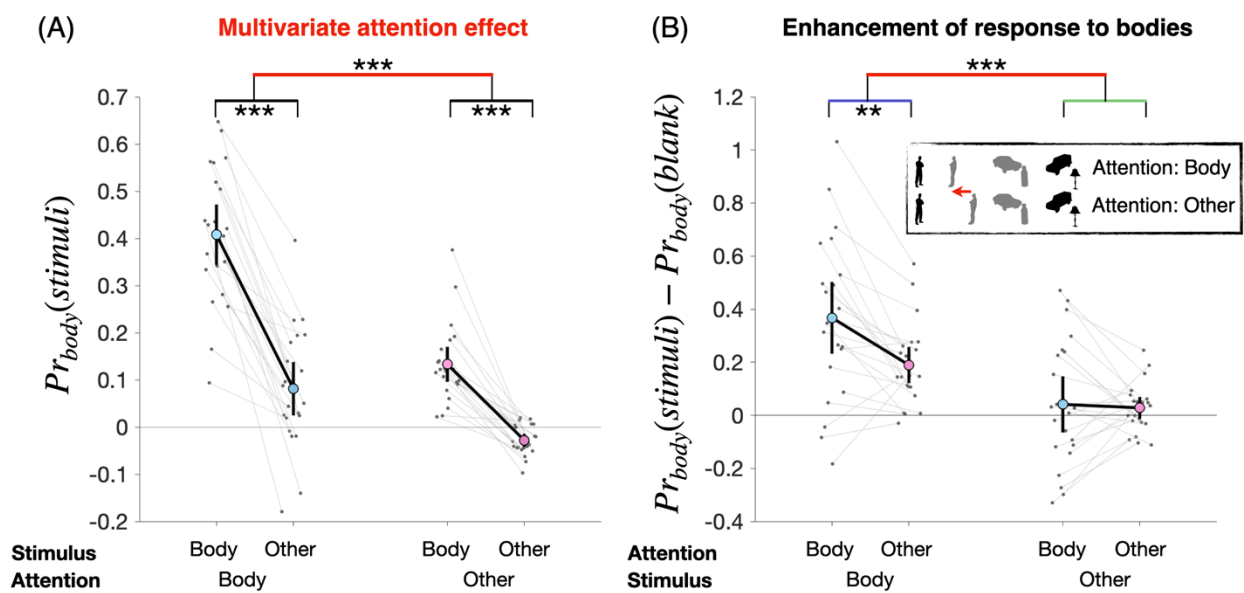

392 **Figure 3: Probing the multivariate attention effect for bodies in LOC.** (A) The selective proximity for  
 393 bodies (proximity to bodies for Body vs Other) is higher when bodies are attended, which is evidence for  
 394 a multivariate attention effect in LOC (comparison highlighted in red), reflecting response gain. (B)  
 395 Proximity (to bodies) of bodies and other categories were compared between the body attention blocks  
 396 and the other category attention blocks, corrected for block-wise differences by subtracting the proximity  
 397 (to bodies) to blank responses within blocks. When bodies were attended, the proximity of bodies was  
 398 enhanced, whereas the proximity of the other categories was not affected (inset: gray objects correspond  
 399

400 to attention-dependent representations and black to benchmark representations). This indicated that the  
401 multivariate attention effect for bodies in LOC (the comparison corresponding to the red bar) was driven  
402 primarily by enhancement of body-selective response patterns when bodies were attended. 95%  
403 confidence intervals for the measures indicated on the y-axes are shown. The asterisks indicate the p-  
404 values for the t-tests of the corresponding comparisons (\* $p < 0.05$ , \*\* $p < 0.01$ , \*\*\* $p < 0.001$ ). Blue:  
405 attentional modulation for bodies; green: attentional modulation for other categories.

406

#### 407 *The relationship between attentional modulation and univariate body selectivity of LOC voxels*

408 Next, we tested whether the multivariate attention effect observed for bodies in LOC depended  
409 on the (univariate) body-selectivity of voxels included in LOC. To this end, we computed the  
410 multivariate attention effect for bodies in an ROI that consisted of LOC voxels that responded  
411 less strongly to bodies than to other categories in the baseline experiment (on average 330.8  
412 out of the original 1000 voxels satisfied this criterion). Results were compared with a size-  
413 matched ROI consisting of randomly-sampled LOC voxels (size-matching done within each  
414 participant; sampled 100 times). Attentional modulation was computed in the same way as for  
415 the whole LOC in the original analysis (red comparison in Fig. 3). Attentional modulation was  
416 stronger for the size-matched ROI than the non-selective ROI ( $t_{21} = 3.1$ ,  $p = 0.006$ ,  $d = 0.68$ ).  
417 However, attentional modulation was significant even in the non-selective ROI ( $t_{21} = 2.1$ ,  $p =$   
418  $0.047$ ,  $d = 0.46$ ). These results suggest that the attentional modulation in LOC was partly but  
419 not exclusively driven by body-selective voxels.

420

#### 421 *Attentional modulation for non-body categories in LOC*

422 Using the multivariate analysis framework outlined above for bodies, we can similarly test for  
423 spatially-global attentional modulation for the other categories. For each non-body category, we  
424 computed the multivariate attention effect as was done for bodies, now using the proximity to

425 that category in the baseline experiment. To reduce the complexity of the ANOVA and the  
426 corresponding visualization of the data, we used *selective proximity* as the dependent measure.  
427 Selective proximity is the proximity difference between the corresponding and non-  
428 corresponding categories (e.g., the difference between the two left-most data points in Fig. 3A).  
429 As an intuition for what this new measure represents, note that in the case of bodies, selective  
430 proximity is analogous to the body selectivity measure in the univariate analysis.

431 In LOC, a 6 (category of interest) x 2 (category attended/unattended) repeated-  
432 measures ANOVA on these selective proximities revealed a significant interaction ( $F_{5,105} = 3.9$ ,  
433  $p = 0.003$ ,  $\eta^2_p = 0.16$ ; Fig. 3A), indicating that attention differentially affected the selective  
434 proximity of the six categories. Six paired-sample t-tests showed that attentional modulation was  
435 significant for bodies ( $t_{21} = 5.5$ ,  $p_{\text{bonf}} < 0.001$ ,  $d = 1.2$ ; red comparison in Fig. 4A), as already  
436 shown in the previous analyses (Fig. 3). No significant multivariate attention effect was  
437 observed for the other categories ( $t_{21} < 2.4$ ,  $p_{\text{bonf}} > 0.1$ ,  $d < 0.5$ ; for all tests; Fig. 4A).

#### 438 *Attentional modulation in EVC*

439 The same analysis was conducted in early visual cortex (EVC; see Materials and Methods). A 6  
440 (category of interest) x 2 (category attended/unattended) repeated-measures ANOVA on  
441 selective proximities revealed a marginally significant interaction ( $F_{5,105} = 2.2$ ,  $p = 0.06$ ,  $\eta^2_p =$   
442  $0.095$ ; Fig. 4B), no significant main effect of attention ( $F_{1,21} = 0.6$ ,  $p = 0.4$ ,  $\eta^2_p = 0.028$ ), and a  
443 marginally significant main effect of category ( $F_{5,105} = 2.2$ ,  $p = 0.06$ ,  $\eta^2_p = 0.096$ ). Paired-sample  
444 t-tests showed no significant attentional modulation for any of the categories ( $|t_{21}| < 2.2$ ,  $p_{\text{bonf}} >$   
445  $0.1$ ,  $d < 0.48$ ; for all tests). Finally, attentional modulation for bodies was significantly stronger in  
446 LOC than in EVC ( $t_{21} = 2.9$ ,  $p = 0.01$ ,  $d = 0.63$ ).

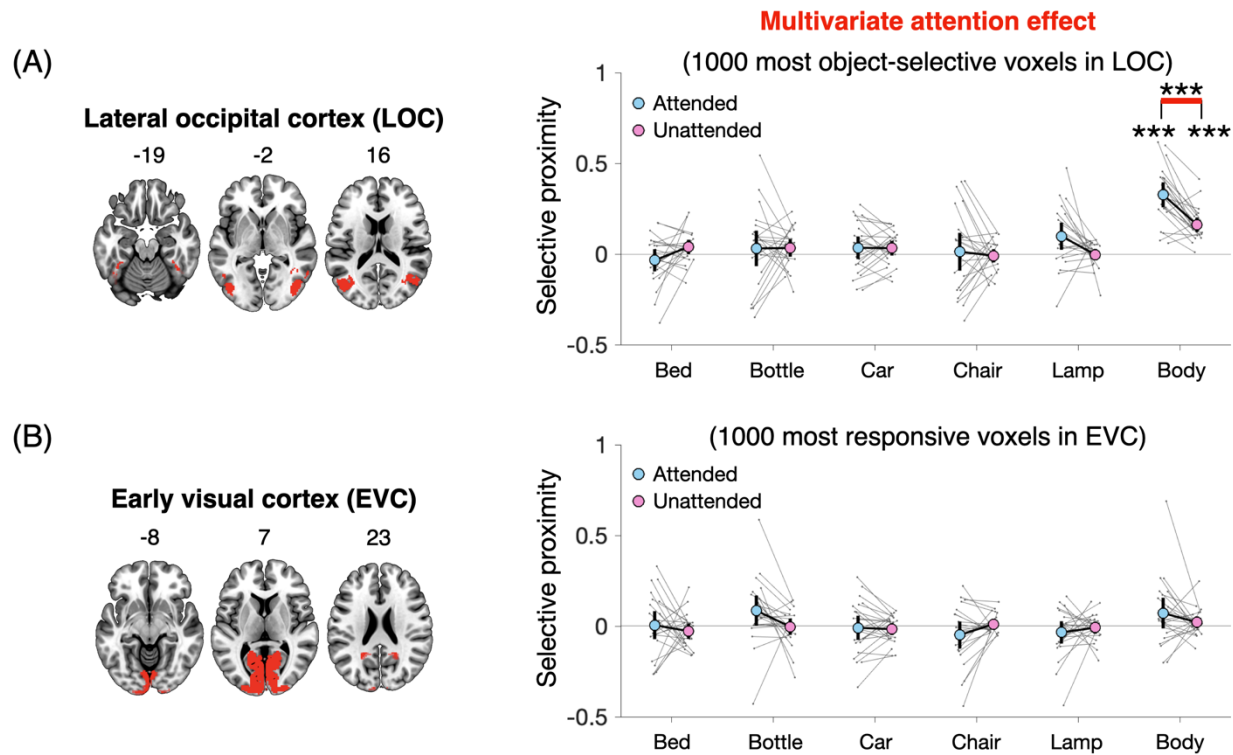

447

448 **Figure 4: Multivariate attention effect.** The selective proximities, for the attended and unattended  
449 conditions, are shown for the six categories in the two ROIs. The multivariate attention effect is the  
450 difference between attended and unattended selective proximity (comparison highlighted in red). A) In  
451 LOC, we find evidence for attentional modulation of the selective proximities of bodies. B) No attentional  
452 modulation was found in EVC. Error bars indicate 95% confidence intervals for the selective proximities.  
453 The asterisks denote Bonferroni corrected p-values for the t-tests of the twelve comparisons related to  
454 selective proximities, and Bonferroni corrected p-values for the t-tests of the six comparisons related to  
455 selective proximity modulations (\* $p < 0.05$ , \*\* $p < 0.01$ , \*\*\* $p < 0.001$ ).

456

457 *The relationship between attentional modulation and behavioral responses*

458 In both multivariate and univariate analyses, we found that the body-selective response elicited  
459 by body silhouettes in task-irrelevant locations was enhanced in body detection blocks  
460 compared with other category detection blocks. This raises the question of whether this  
461 attentional modulation affected behavior in the detection task. Particularly, did participants

462 disproportionately false alarm to the bodies at task-irrelevant locations when detecting bodies at  
463 task-relevant locations? Because of the orthogonal design, each category (+blank stimulus) in  
464 the irrelevant location appeared equally often with each category (+blank stimulus) in the  
465 relevant location. Therefore, when the target category (e.g., bodies) appeared at the task-  
466 irrelevant location no target was presented at the task-relevant locations in most trials (6/7th),  
467 and participants had to withhold their response. For these trials, we tested whether responses  
468 (i.e., false alarms) depended on the combination of the category presented and the category  
469 that was the target in that block. To this end, for each category, we computed the difference  
470 between the false alarm rate (FA) to that category and the average FA to the other categories,  
471 separately for each block. We then compared this  $\Delta$ FA for trials in which the object matched the  
472 target category (e.g., bodies presented in body blocks) and trials in which the object  
473 mismatched the target category (e.g., bodies presented in bed blocks).

474 A 2 (matching, non-matching) x 6 (target category) repeated-measures ANOVA on  $\Delta$ FA  
475 revealed a significant interaction ( $F_{5,105} = 3.3$ ,  $p = 0.008$ ,  $\eta^2_p = 0.14$ ; Fig. 6). Six paired-sample t-  
476 tests showed that  $\Delta$ FA was stronger when the object matched the target category for all  
477 categories ( $t_{21} > 2.9$ ,  $p_{\text{bonf}} < 0.05$ ,  $d > 0.63$ , for all non-body categories, biggest difference of  
478 6.5% for cars; bodies:  $t_{21} = 2.79$ ,  $p_{\text{bonf}} = 0.066$ , difference of 3.7%,  $d = 0.61$ ). These results show  
479 that participants disproportionately false alarmed when the target category was shown at the  
480 task-irrelevant location. Contrary to the fMRI results, however, this effect was relatively weak for  
481 bodies.

482

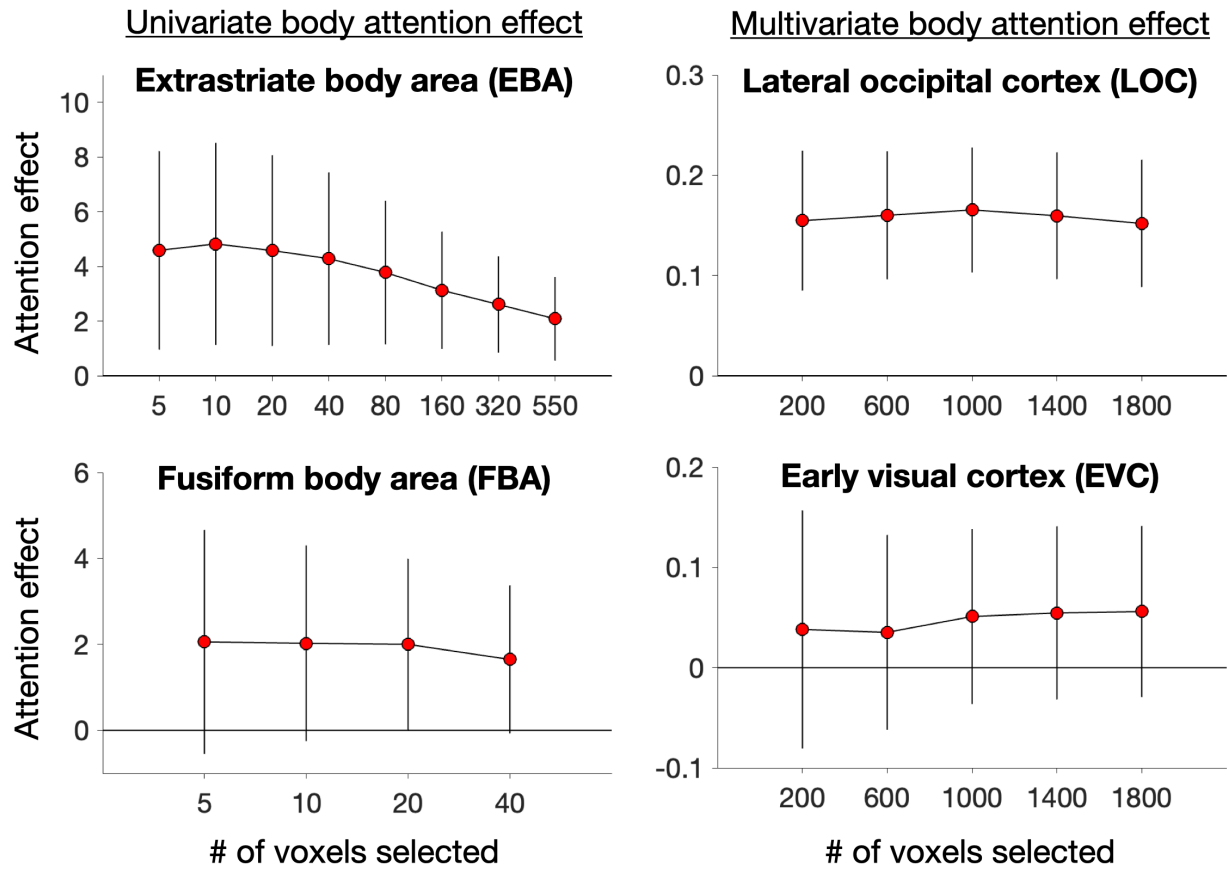

483

484

485 **Figure 5: The influence of voxel selection on body attention effects.** The univariate attention effects,  
486 for EBA and FBA, and the multivariate attention effects, for LOC and EVC, for bodies, are shown as a  
487 function of the number of voxels selected within each ROI. The attention effects for bodies observed in  
488 EBA, FBA, and LOC, are observed regardless of the number of voxels selected. Error bars indicate 95%  
489 confidence intervals for the attention effects.

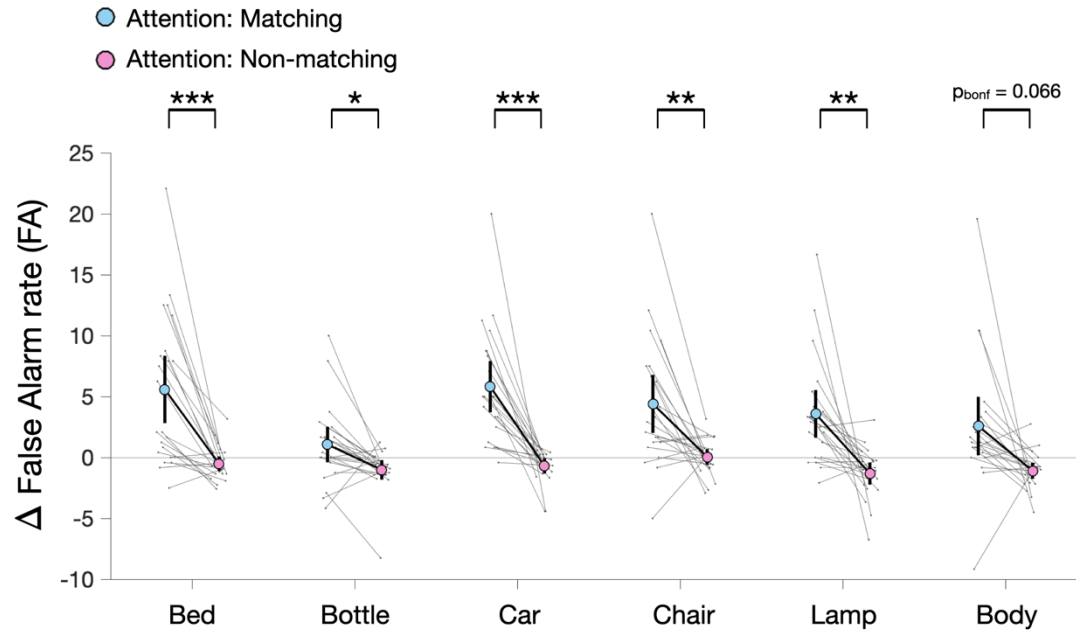

490

491 **Figure 6: The relationship between attentional modulation and behavioral responses.** Participants  
492 disproportionately false alarmed when the target category was shown at the task-irrelevant location  
493 (matching>non-matching) but this effect was relatively weak for bodies. Error bars indicate 95%  
494 confidence intervals for  $\Delta$ FA. The asterisks denote instances where t-tests returned  $p_{\text{bonf}} < 0.05$  for the  
495 corresponding comparisons (\* $p < 0.05$ , \*\* $p < 0.01$ , \*\*\* $p < 0.001$ ).

#### 496 *Image-based discriminability*

497 In all fMRI analyses, we found that bodies were more strongly represented and more strongly  
498 modulated by attention than the other categories. This could reflect an interesting property of  
499 bodies, for example, related to the life-time relevance of detecting conspecifics or to the  
500 increased familiarity with body shapes. However, it could potentially also reflect uncontrolled  
501 image-based differences: perhaps the body silhouettes included in the study stood out from the  
502 other objects in terms of low-level features. To exclude this possibility, we decoded object  
503 categories from the object exemplar representations in the layers of a convolutional neural  
504 network trained for object recognition (Materials and Methods). For each of the 6 categories, in  
505 each layer of the CNN, one-vs-all linear discriminant classifiers were trained to discriminate



506 each category from the other categories using the 50 exemplars of each category presented in  
507 the fMRI experiment. 10-fold cross-validation accuracies were analyzed across the objects.

508 As shown in Fig. 7, bodies were less discriminable than most other categories in the  
509 early layers of the CNN. It is only in the mid to final layers - where overall classification is almost  
510 at ceiling - that the classification accuracy for bodies is similar to the average accuracies for the  
511 other categories. This result shows that the image-based discriminability was, if anything, lower  
512 for bodies than for the other objects.

513

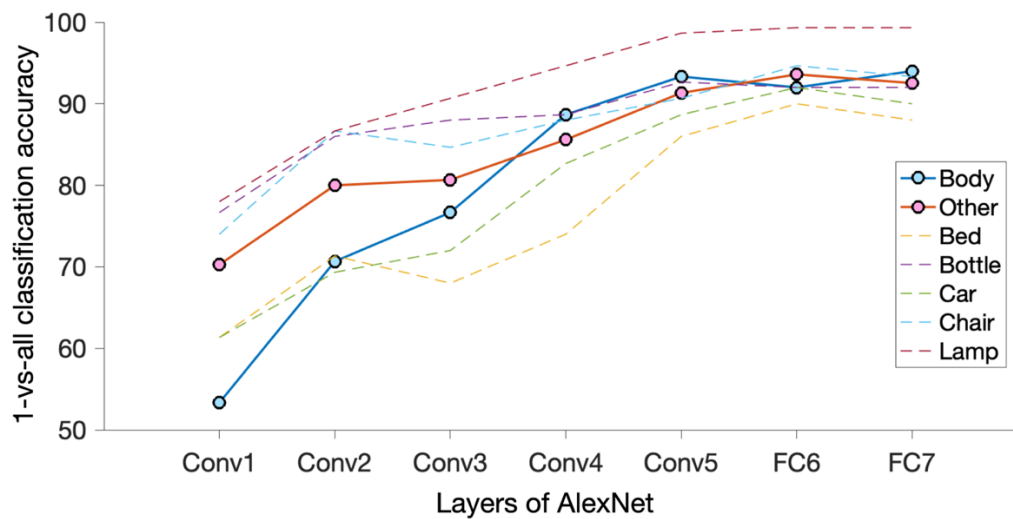

514

515 **Figure 7: Hierarchical image-based discriminability of the exemplars used in the fMRI experiment.**

516 One-vs-all classifiers were trained for each of the six categories, on the output activations of each layer of  
517 a convolutional neural network trained for object recognition (AlexNet). 10-fold crossvalidation accuracies  
518 are shown for all the objects in addition to the average accuracies for the non-body objects (termed  
519 'Other'). Discriminability based on low-level features (corresponding to the early layers of the AlexNet)  
520 was, if anything, lower for the human bodies than for the other objects. Therefore, it is unlikely that the  
521 body-selective fMRI results reflect a distinct low-level property of bodies. 'Conv' refers to the convolutional  
522 layers of AlexNet and 'FC' refers to the fully-connected layers.

## 523 **Discussion**

524 Across multiple analyses, we found convincing evidence that attention to human bodies  
525 enhanced visual cortex responses selective to bodies presented at task-irrelevant locations.  
526 This modulation reflected response gain rather than a generic bias, and could not be explained  
527 by low-level feature similarity of bodies. These results indicate that spatially-global attentional  
528 modulation – a hallmark of feature-based attention – can be found for features diagnostic of the  
529 presence of the human body.

530 The attentional effects observed here for body silhouettes are unlikely to reflect attention  
531 to low-level features such as orientation or color, for several reasons. First, we included a  
532 relatively large number of object categories in the experiment to ensure that participants could  
533 not detect objects based on low-level features, as these were shared with other categories (e.g.,  
534 bottles were vertical, similar to bodies). Second, we presented object silhouettes instead of  
535 photographs to avoid possible low-level differences between categories in texture or color.  
536 Third, the image-based discriminability for each category, established using a convolutional  
537 neural network (CNN), indicated that bodies were difficult to discriminate from other categories  
538 based on low-level features encoded in the early layers of the CNN. Finally, the fMRI results  
539 showed attentional modulation in object-selective cortex (LOC) and body-selective EBA/FBA,  
540 but not early visual cortex (EVC), indicating an attentional modulation at a higher level of visual  
541 processing.

542 Our results are in line with the feature similarity gain modulation model (FSGM; Maunsell  
543 & Treue, 2006) by showing that feature-based attention enhanced the response to the voxels '  
544 preferred stimuli. Specifically, attention to bodies made the response pattern evoked by task-  
545 irrelevant bodies more similar to prototypical body response patterns established in a separate  
546 baseline experiment. Furthermore, these attention effects were strongest in body-selective  
547 voxels of LOC. Finally, reliable univariate attention effects were observed in independently-

548 defined body-selective regions (EBA/FBA). It should be noted that we did not find evidence that  
549 responses to the other categories were suppressed, as proposed by FSGM. However, the  
550 response to other categories was low and any suppression (posited to be smaller in magnitude  
551 than enhancement by FSGM) might not be observable in this case.

552         The finding of spatially-global modulation for human bodies adds to previous evidence  
553 for global modulation for faces. Specifically, in one study, peripherally presented and task-  
554 irrelevant faces evoked a stronger face-selective N170 electro-encephalography (EEG)  
555 response when participants attended to faces than to houses (Störmer et al., 2019).  
556 Furthermore, in fMRI, responses to peripheral faces in the face-selective fusiform face area  
557 (FFA) were more strongly modulated by the task-set of the participants (i.e., whether or not they  
558 focused on faces) than by spatial attention (Reddy et al., 2007). Together with the current  
559 findings, these results provide evidence for spatially-global attentional modulation for bodies and  
560 faces, two socially relevant categories that are selectively represented in the visual cortex  
561 (Downing et al., 2006; Kanwisher, 2010).

562         While these results suggest that bodies and faces may be special – reflecting their  
563 unique social and biological significance – we do not rule out that spatially-global attentional  
564 modulation may also exist for other highly-familiar object categories. For example, behavioral  
565 studies showed that animals and vehicles could be detected in the near-absence of spatial  
566 attention (Li et al., 2002; but see Cohen et al., 2011), with category-based attention facilitating  
567 object detection independently of spatial attention (Stein and Peelen, 2017). Indeed, based on  
568 the overlap in human and animal features in detection tasks (Evans and Treisman, 2005), it is  
569 plausible that our results would generalize to other animals, particularly those that activate  
570 body-selective regions (Downing et al., 2006). Similarly, extensive experience with particular  
571 objects may drive selective neural tuning (Gauthier and Logothetis, 2000; McGugin et al., 2012;  
572 Frank et al., 2014) and give rise to similar behavioral advantages as those observed for bodies  
573 (Hershler and Hochstein, 2009; Golan et al., 2014; Reeder et al., 2016; Stein et al., 2016).

574 Taking everything together, the evidence suggests that features that are diagnostic of  
575 bodies meet many of the previously proposed criteria for basic features: showing spatially-global  
576 attentional modulation (Maunsell and Treue, 2006), being processed “early, automatically, and  
577 in parallel across the visual field” (Treisman and Gelade, 1980), and being represented  
578 selectively in the visual system (Treisman, 2006). Indeed, Treisman (2006) proposed that the  
579 feature detectors of the feature integration theory are not necessarily limited to low-level  
580 features such as orientation and color. Raising the possibility that there may be animal feature  
581 detectors, Treisman (2006) noted that animal features may not necessarily be more complex for  
582 the visual system than colors, line orientations, or direction of motion. By providing evidence for  
583 spatially-global attentional modulation for human bodies, our results support this proposal.

584 Our findings raise the question of what features are attended when attention is directed  
585 to bodies. Addressing this question for animals, Treisman (2006) suggested that: “participants  
586 may be set to sense, in parallel, a highly overlearned vocabulary of features that characterize a  
587 particular semantic category.” One possibility is thus that attention to bodies is mediated by  
588 attention to a set of mid-level features that are diagnostic of human bodies (Ullman et al., 2002;  
589 Reeder and Peelen, 2013). Alternatively, attention may be directed to holistic representations of  
590 body shape (Reed et al., 2003; Stein et al., 2012). Future studies could test these alternatives  
591 by measuring global attentional modulation for various body-related features, body parts, and  
592 inverted bodies at the task-irrelevant location while participants attend to bodies at the task-  
593 relevant locations (Reeder and Peelen, 2013).

594 To conclude, the current results provide evidence for spatially-global attentional  
595 modulation for human bodies in high-level visual cortex, linking this modulation to body-selective  
596 representations in univariate and multivariate analyses. Combining these results with previous  
597 behavioral and neuroimaging studies, we propose that bodies may be processed as basic  
598 features, supporting the rapid and parallel detection of conspecifics in our environment even  
599 outside the focus of spatial attention.

600 **References**

- 601 Carrasco M (2011) Visual attention: The past 25 years. *Vision Research* 51:1484–1525.
- 602 Chun MM, Golomb JD, Turk-Browne NB (2011) A Taxonomy of External and Internal Attention.
- 603 *Annu Rev Psychol* 62:73–101.
- 604 Cohen MA, Alvarez GA, Nakayama K (2011) Natural-Scene Perception Requires Attention.
- 605 *Psychol Sci* 22:1165–1172.
- 606 Downing PE, Bray D, Rogers J, Childs C (2004) Bodies capture attention when nothing is
- 607 expected. *Cognition* 93:B27–B38.
- 608 Downing PE, Chan AW-Y, Peelen MV, Dodds CM, Kanwisher N (2006) Domain Specificity in
- 609 Visual Cortex. *Cerebral Cortex* 16:1453–1461.
- 610 Downing PE, Jiang Y, Shuman M, Kanwisher N (2001) A Cortical Area Selective for Visual
- 611 Processing of the Human Body. *Science* 293:2470–2473.
- 612 Evans KK, Treisman A (2005) Perception of Objects in Natural Scenes: Is It Really Attention
- 613 Free? *Journal of Experimental Psychology: Human Perception and Performance* 31:1476–1492.
- 614 Fedorenko E, Hsieh P-J, Nieto-Castañón A, Whitfield-Gabrieli S, Kanwisher N (2010) New
- 615 Method for fMRI Investigations of Language: Defining ROIs Functionally in Individual Subjects.
- 616 *Journal of Neurophysiology* 104:1177–1194.
- 617 Frank SM, Reavis EA, Tse PU, Greenlee MW (2014) Neural mechanisms of feature conjunction
- 618 learning: Enduring changes in occipital cortex after a week of training: Neural Mechanisms of
- 619 Feature Conjunction Learning. *Hum Brain Mapp* 35:1201–1211.
- 620 Gauthier I, Logothetis NK (2000) Is face recognition not so unique after all? *Cognitive*
- 621 *Neuropsychology* 17:125–142.
- 622 Golan T, Bentin S, DeGutis JM, Robertson LC, Harel A (2014) Association and dissociation
- 623 between detection and discrimination of objects of expertise: Evidence from visual search. *Atten*
- 624 *Percept Psychophys* 76:391–406.

625 Haushofer J, Livingstone MS, Kanwisher N (2008). Multivariate patterns in object-selective  
626 cortex dissociate perceptual and physical shape similarity. *PLoS Biol.* 6 (7), e187.

627 Hershler O, Hochstein S (2009) The importance of being expert: Top-down attentional control in  
628 visual search with photographs. *Attention, Perception & Psychophysics* 71:1478–1486.

629 Jehee JFM, Brady DK, Tong F (2011) Attention Improves Encoding of Task-Relevant Features  
630 in the Human Visual Cortex. *Journal of Neuroscience* 31:8210–8219.

631 Julian JB, Fedorenko E, Webster J, Kanwisher N (2012) An algorithmic method for functionally  
632 defining regions of interest in the ventral visual pathway. *NeuroImage* 60:2357–2364.

633 Kamitani Y, Tong F (2005) Decoding the visual and subjective contents of the human brain. *Nat*  
634 *Neurosci* 8:679–685.

635 Kanwisher N (2010) Functional specificity in the human brain: A window into the functional  
636 architecture of the mind. *Proceedings of the National Academy of Sciences* 107:11163–11170.

637 Krizhevsky A, Sutskever I, Hinton GE (2012) ImageNet classification with deep convolutional  
638 neural networks. *Adv Neural Inform Process Syst* 1:1097–1105.

639 Li FF, VanRullen R, Koch C, Perona P (2002) Rapid natural scene categorization in the near  
640 absence of attention. *Proceedings of the National Academy of Sciences* 99:9596–9601.

641 Liu T, Larsson J, Carrasco M (2007) Feature-Based Attention Modulates Orientation-Selective  
642 Responses in Human Visual Cortex. *Neuron* 55:313–323.

643 Maunsell JHR, Treue S (2006) Feature-based attention in visual cortex. *Trends in*  
644 *Neurosciences* 29:317–322.

645 McGugin RW, Gatenby JC, Gore JC, Gauthier I (2012) High-resolution imaging of expertise  
646 reveals reliable object selectivity in the fusiform face area related to perceptual performance.  
647 *Proceedings of the National Academy of Sciences* 109:17063–17068.

648 Op de Beeck HP, Torfs K, Wagemans J (2008). Perceived shape similarity among unfamiliar  
649 objects and the organization of the human object vision pathway. *J. Neurosci.* 28 (40), 10111–  
650 10123.

- 651 Peelen MV, Downing PE (2005) Selectivity for the Human Body in the Fusiform Gyrus. *Journal*  
652 *of Neurophysiology* 93:603–608.
- 653 Peelen MV, Fei-Fei L, Kastner S (2009) Neural mechanisms of rapid natural scene  
654 categorization in human visual cortex. *Nature* 460:94–97.
- 655 Peelen MV, Kastner S (2011) A neural basis for real-world visual search in human  
656 occipitotemporal cortex. *Proceedings of the National Academy of Sciences* 108:12125–12130.
- 657 Reddy L, Moradi F, Koch C (2007) Top–down biases win against focal attention in the fusiform  
658 face area. *NeuroImage* 38:730–739.
- 659 Reed CL, Stone VE, Bozova S, Tanaka J (2003) The body-inversion effect. *Psychological*  
660 *Science* 14:302–308.
- 661 Reeder RR, Peelen MV (2013) The contents of the search template for category-level search in  
662 natural scenes. *Journal of Vision* 13:13–13.
- 663 Reeder RR, Stein T, Peelen MV (2016) Perceptual expertise improves category detection in  
664 natural scenes. *Psychon Bull Rev* 23:172–179.
- 665 Reeder RR, van Zoest W, Peelen MV (2015) Involuntary attentional capture by task-irrelevant  
666 objects that match the search template for category detection in natural scenes. *Atten Percept*  
667 *Psychophys* 77:1070–1080.
- 668 Ro T, Friggel A, Lavie N (2007) Attentional biases for faces and body parts. *Visual Cognition*  
669 15:322–348.
- 670 Saenz M, Buracas GT, Boynton GM (2002) Global effects of feature-based attention in human  
671 visual cortex. *Nat Neurosci* 5:631–632.
- 672 Serences JT, Boynton GM (2007) Feature-Based Attentional Modulations in the Absence of  
673 Direct Visual Stimulation. *Neuron* 55:301–312.
- 674 Smith S, Nichols T (2009) Threshold-free cluster enhancement: Addressing problems of  
675 smoothing, threshold dependence and localisation in cluster inference. *NeuroImage* 44:83–98.

676 Stein T, Peelen MV (2017) Object detection in natural scenes: Independent effects of spatial  
677 and category-based attention. *Atten Percept Psychophys* 79:738–752.

678 Stein T, Reeder RR, Peelen MV (2016) Privileged Access to Awareness for Faces and Objects  
679 of Expertise. *Journal of Experimental Psychology: Human Perception and Performance* 42:788–  
680 798.

681 Stein T, Sterzer P, Peelen MV (2012) Privileged detection of conspecifics: Evidence from  
682 inversion effects during continuous flash suppression. *Cognition* 125:64–79.

683 Störmer VS, Cohen MA, Alvarez GA (2019) Tuning Attention to Object Categories: Spatially  
684 Global Effects of Attention to Faces in Visual Processing. *Journal of Cognitive Neuroscience*  
685 31:937–947.

686 Treisman A (2006) How the deployment of attention determines what we see. *Visual Cognition*  
687 14:411–443.

688 Treisman AM, Gelade G (1980) A Feature-Integration Theory of Attention. *Cognitive Psychology*  
689 12:97–136.

690 Treue S, Trujillo JCM (1999) Feature-based attention influences motion processing gain in  
691 macaque visual cortex. *Nature* 399:575–579.

692 Ullman S, Vidal-Naquet M, Sali E (2002) Visual features of intermediate complexity and their  
693 use in classification. *Nat Neurosci* 5:682–687.

694 Wohlschläger AM, Specht K, Lie C, Mohlberg H, Wohlschläger A, Bente K, Pietrzyk U, Stöcker  
695 T, Zilles K, Amunts K, Fink GR (2005) Linking retinotopic fMRI mapping and anatomical  
696 probability maps of human occipital areas V1 and V2. *NeuroImage* 26:73–82.

697 Wolfe JM (1994) Guided search 2.0. A revised model of visual search. *Psychon Bull Rev* 1:202–  
698 238.

699 Xiao J, Hays J, Ehinger KA, Oliva A, Torralba A (2010) SUN database: Large-scale scene  
700 recognition from abbey to zoo. In: 2010 IEEE Computer Society Conference on Computer



701 Vision and Pattern Recognition, pp 3485–3492. San Francisco, CA, USA: IEEE. Available at:  
702 <http://ieeexplore.ieee.org/document/5539970/> [Accessed October 1, 2021].  
703 Zhang W, Luck SJ (2009) Feature-based attention modulates feedforward visual processing.  
704 Nat Neurosci 12:24–25.  
705
